# Supplementary material for: Molecular mechanism of the effect of ZnCl2 and MgCl2 solution on the conformation of the tau267–312 monomer
Source: Royal Society of Chemistry journal article supplement (doi:10.1039/d4sm01546k), 2025-01-01
Supplement: d4sm01546k1.pdf [file d4sm01546k1.pdf]

Supplementary Information for

**Molecular mechanism of the effect of  $\text{ZnCl}_2$  and  $\text{MgCl}_2$   
solution on the conformation of  $\text{Tau}_{267-312}$  monomer**

Yipeng Chen<sup>a</sup>, Jiantao Yin<sup>a</sup>, Yanhui Liu<sup>b</sup>, Yue Huang<sup>a</sup>, Wenjun Zong<sup>a</sup> and Rongri  
Tan<sup>a\*</sup>

<sup>a</sup>Department of Physics, Jiangxi Science and Technology Normal University,  
Nanchang, 330013, China

<sup>b</sup>College of Physics, Guizhou University, Guiyang, 550025, China

\*Corresponding author:

Pr. Rongri Tan

E-mail address: [rogertan@hotmail.com](mailto:rogertan@hotmail.com)

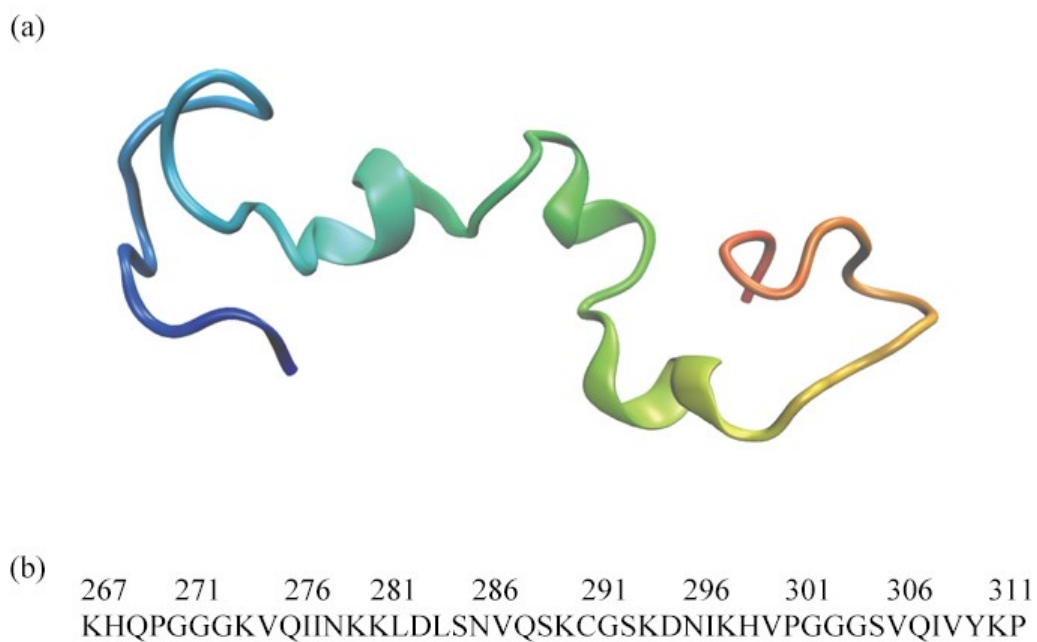

**Fig. S1** Schematic ribbon diagrams of a. Tau(2MZ7) and b. primary sequence of the protein.

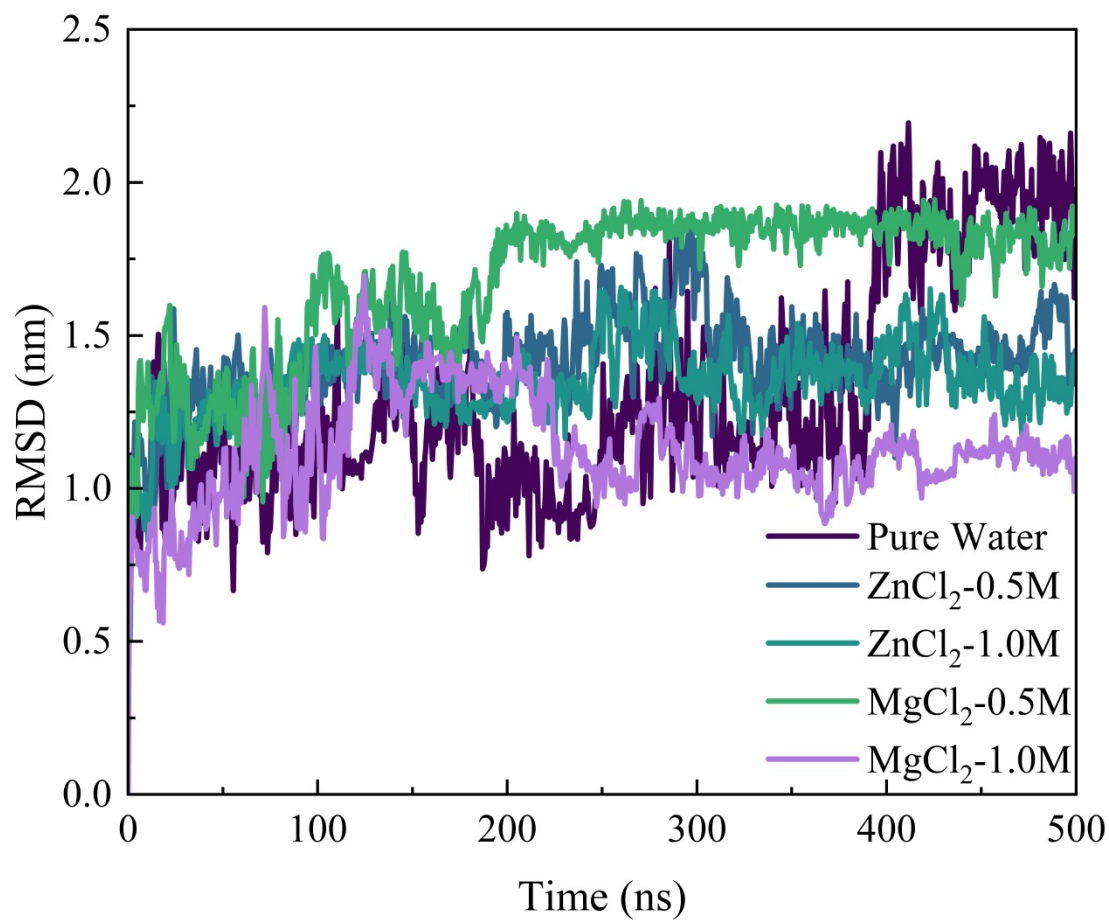

**Fig. S2** Stability and rigidity of Tau protein. The RMSD values of each system.
